# Supplementary material
Source: Springer Nature journal article supplement (https://www.springermedizin.de/resource/supplementary/12889_2008_1547_MOESM3_ESM.pdf/9503400)

# A Test Use Among Men

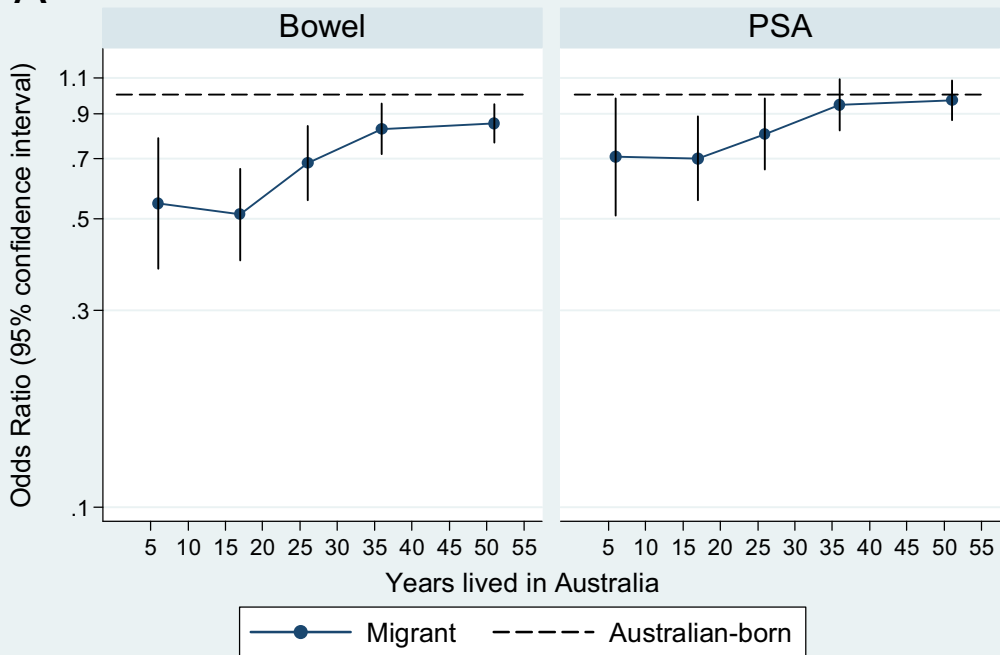

# B Test Use Among Women

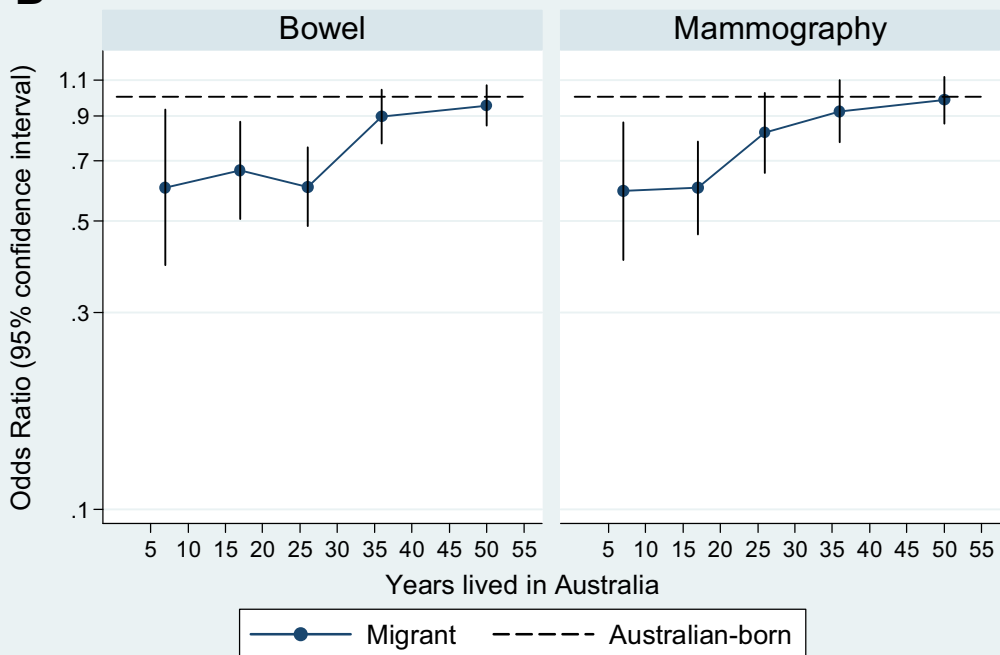

Supplement: MOESM3 [file 9503400]
